# Supplementary material for: Validation and implementation of a method for microarray gene expression profiling of minor B-cell subpopulations in man
Source: BMC Immunol. 2014 Jan 31;15:3. doi: 10.1186/1471-2172-15-3 (PMC3937209; doi:10.1186/1471-2172-15-3)
Supplement: Additional file 10 — Gene specific B-cell atlas in BM. Significantly up-regulated genes in normal B-cell subsets from BM were generated by a 2-way ANOVA model, including donor and B-cell subsets. Up-regulated genes in each B-cell subset compared to the rest were created (fold change > 2, FDR p-values below 0.05). The top 50 from this list are presented in accordance to p-value. (XLSX 39 kb) [file 1471-2172-15-3-S10.xlsx]

## Sheet: Top50 BM
Transcript ID	Gene Symbol	B Subset	p value	Fold-Change
3327143	RAG1	PreBI	1.85193e-18	6.84282
3369931	RAG2	PreBI	2.19484e-16	13.9575
2453307	CD34	PreBI	3.76003e-16	6.25381
3253683	ZMIZ1	PreBI	2.56884e-15	4.1679
2616596	ARPP21	PreBI	6.9585e-15	6.14853
2931569	AKAP12	PreBI	7.75634e-15	5.70872
3426257	SOCS2	PreBI	1.50952e-14	5.87642
3259503	DNTT	PreBI	1.40009e-13	51.2715
3852880	EMR2	PreBI	1.71115e-13	3.8052
3817698	UHRF1	PreBI	2.38161e-13	4.84814
3938792	VPREB1	PreBI	2.80029e-13	11.0423
3737874	BAHCC1	PreBI	1.82903e-12	12.0991
3473750	VSIG10	PreBI	1.99579e-12	2.87751
3955815	HPS4	PreBI	2.33505e-12	4.30566
3921068	ETS2	PreBI	2.79825e-12	6.77281
2371547	C1orf21	PreBI	2.84362e-12	3.18812
3624513	MYO5C	PreBI	3.34523e-12	7.50761
2679014	NPCDR1	PreBI	4.91782e-12	5.93375
3463112	E2F7	PreBI	5.18744e-12	2.82729
4001369	SCML2	PreBI	7.26441e-12	5.09399
3142217	PAG1	PreBI	7.37903e-12	3.99335
2649824	SCHIP1	PreBI	7.61129e-12	5.32882
2833623	HMHB1	PreBI	8.56208e-12	8.84485
2692447	MYLK	PreBI	1.20277e-11	3.09062
3061319	CDK6	PreBI	1.21366e-11	4.78241
3931765	ERG	PreBI	1.47279e-11	13.777
3365776	E2F8	PreBI	1.48494e-11	4.81081
3599811	KIF23	PreBI	2.36148e-11	7.33074
3980560	KIF4A	PreBI	2.85849e-11	5.91067
3254609	SH2D4B	PreBI	3.2019e-11	2.73254
2648677	MME	PreBI	3.62144e-11	11.0656
3312490	MKI67	PreBI	4.82636e-11	13.6351
3510450	LHFP	PreBI	5.43377e-11	3.20461
3264621	TCF7L2	PreBI	6.04572e-11	6.49586
2748830	GUCY1A3	PreBI	6.66612e-11	5.38615
3907011	ADA	PreBI	6.96592e-11	3.60896
3286792	C10orf25	PreBI	7.63839e-11	5.49685
2913694	CD109	PreBI	8.89632e-11	2.75035
3353335	UBASH3B	PreBI	1.05771e-10	2.94153
3279982	PTPLA	PreBI	1.33786e-10	3.01326
3474104	CIT	PreBI	1.36431e-10	2.97741
3771642	CYGB	PreBI	1.4557e-10	3.76321
3454223	RACGAP1	PreBI	1.63981e-10	4.53916
2781138	LEF1	PreBI	1.75523e-10	6.26857
3538893	PRKCH	PreBI	1.77418e-10	5.39861
3333247	FADS2	PreBI	1.93232e-10	2.21961
3820921	SMARCA4	PreBI	2.17854e-10	2.30177
3876645	BTBD3	PreBI	2.24743e-10	3.32512
3409211	PPFIBP1	PreBI	2.7512e-10	2.97723
3751323	MYO18A	PreBI	2.86781e-10	2.06987
3327143	RAG1	PreBII	3.51244e-17	5.45874
3369931	RAG2	PreBII	1.39003e-16	14.466
3365776	E2F8	PreBII	9.96265e-15	8.62105
2875193	P4HA2	PreBII	1.17502e-14	4.67379
2616596	ARPP21	PreBII	1.2546e-14	5.82361
3463112	E2F7	PreBII	6.46824e-14	3.50501
3291435	RTKN2	PreBII	1.45855e-13	4.20233
3938792	VPREB1	PreBII	7.50307e-13	9.85163
3461496	BEST3	PreBII	2.15971e-12	6.55887
2597867	IKZF2	PreBII	2.19812e-12	9.04414
2931569	AKAP12	PreBII	4.24538e-12	3.72989
2969289	WASF1	PreBII	4.67191e-12	8.95872
3936913	CDC45	PreBII	4.95597e-12	6.53354
3980560	KIF4A	PreBII	1.40918e-11	6.20815
3882012	DNMT3B	PreBII	1.53165e-11	2.41757
2715076	WHSC1	PreBII	1.70983e-11	2.58676
2648677	MME	PreBII	2.12174e-11	11.5997
3744965	GAS7	PreBII	3.12753e-11	3.98177
3779950	C18orf1	PreBII	3.43496e-11	2.7252
4011743	SLC7A3	PreBII	3.46647e-11	4.55121
3876645	BTBD3	PreBII	3.48257e-11	3.68845
3744263	AURKB	PreBII	3.49571e-11	4.33564
3625761	MNS1	PreBII	4.81275e-11	5.32297
2570616	BUB1	PreBII	5.58379e-11	6.19522
3454223	RACGAP1	PreBII	6.30936e-11	4.82738
2401448	E2F2	PreBII	7.95861e-11	2.92952
2688605	GCET2	PreBII	9.37008e-11	5.42262
3607537	FANCI	PreBII	1.18233e-10	5.20076
2752725	NEIL3	PreBII	1.35859e-10	5.24936
3599811	KIF23	PreBII	1.4212e-10	6.18011
3994915	HMGB3	PreBII	2.17041e-10	3.26913
2620256	KIF15	PreBII	2.19047e-10	7.56672
3758317	BRCA1	PreBII	2.35745e-10	3.45264
2784113	CCNA2	PreBII	2.38457e-10	5.07104
3689880	SHCBP1	PreBII	2.50111e-10	4.90447
2516023	CDCA7	PreBII	2.77424e-10	3.85317
3920003	CHAF1B	PreBII	2.85823e-10	3.14256
2781138	LEF1	PreBII	2.88141e-10	5.94603
3604147	KIAA1199	PreBII	3.3051e-10	2.19588
2858592	DEPDC1B	PreBII	3.48035e-10	5.94644
3852565	ASF1B	PreBII	3.53886e-10	3.83229
3578152	TCL1A	PreBII	3.67896e-10	6.83255
4052881	FAM72D	PreBII	3.68498e-10	6.97116
3590014	CASC5	PreBII	3.7903e-10	5.94262
3651478	ACSM3	PreBII	3.98615e-10	6.22812
3312490	MKI67	PreBII	4.03716e-10	10.469
3140478	C8orf84	PreBII	4.22879e-10	2.20585
3129149	PBK	PreBII	4.3187e-10	7.50969
2388219	EXO1	PreBII	4.70648e-10	6.01764
3319937	WEE1	PreBII	5.37168e-10	2.72585
3578152	TCL1A	I	1.97659e-11	9.08392
3881651	HCK	I	7.89912e-11	3.88036
3861272	PPP1R14A	I	1.86286e-10	3.47484
2999755	AEBP1	I	3.50341e-10	3.10351
3684039	CRYM	I	1.18407e-09	3.26679
3204648	CD72	I	1.25209e-09	4.29321
3919860	DOPEY2	I	1.3315e-09	2.44982
3403092	PTPN6	I	2.37822e-09	2.30103
3057370	HIP1	I	1.02572e-08	2.10096
3329983	PTPRJ	I	1.2021e-08	4.73951
2733483	BMP3	I	1.34798e-08	4.21256
3924041	ADARB1	I	1.96987e-08	3.51631
2810764	GAPT	I	2.41139e-08	3.32974
3244622	ALOX5	I	2.87208e-08	2.54191
2969289	WASF1	I	3.58551e-08	4.11253
2524653	ADAM23	I	4.07006e-08	5.47356
3381817	UCP2	I	4.45091e-08	2.51428
3154263	SLA	I	5.00481e-08	3.03178
4035833	CD24	I	7.8164e-08	2.31471
2579572	ZEB2	I	9.79146e-08	2.3381
2439101	FCRL1	I	1.06753e-07	4.50854
3098977	LYN	I	1.28931e-07	3.00229
3432556	DTX1	I	1.69219e-07	2.68805
3839346	SPIB	I	1.73182e-07	3.6161
3839360	MYBPC2	I	1.79302e-07	3.11105
2363852	FCRLA	I	2.64924e-07	3.53857
2689286	KIAA1407	I	2.88518e-07	3.5438
3061997	PON2	I	2.90971e-07	2.64081
3151970	MTSS1	I	3.11587e-07	3.70199
3926271	TMPRSS15	I	3.70629e-07	2.25373
3703129	C16orf74	I	3.71181e-07	2.34003
3621623	ELL3	I	4.10536e-07	3.30223
2373842	PTPRC	I	5.05014e-07	2.44768
2687255	CBLB	I	5.06101e-07	2.50839
3824427	FAM129C	I	5.84748e-07	2.6327
2349129	S1PR1	I	6.22487e-07	3.06545
3178952	SYK	I	6.95725e-07	2.14414
3822849	CLEC17A	I	7.02307e-07	2.94784
2678298	DNASE1L3	I	8.15611e-07	2.93188
2405250	FNDC5	I	9.9972e-07	2.99812
2475678	LBH	I	1.0709e-06	2.87814
2451139	ARL8A	I	1.08778e-06	2.68926
3740201	MYO1C	I	1.11553e-06	3.16235
2860178	CD180	I	1.21781e-06	2.80416
2603051	SP110	I	1.26954e-06	2.16403
2470165	TRIB2	I	1.50586e-06	2.61702
3060117	ABCB4	I	1.91893e-06	2.57485
3915936	NCAM2	I	2.09678e-06	2.29899
3333595	GNG3	I	2.29224e-06	3.9313
3516639	PCDH9	I	2.31494e-06	3.19958
2734421	ARHGAP24	M	6.91971e-16	6.52086
2530425	COL4A3	M	1.96583e-14	2.70098
3869097	SIGLEC6	M	5.34399e-14	3.39385
2936657	CCR6	M	6.53285e-14	4.58948
3708462	ACAP1	M	7.09309e-14	2.45807
2945741	FAM65B	M	3.87758e-13	3.37026
2439554	AIM2	M	8.20013e-13	24.611
3290875	ANK3	M	9.02717e-13	2.45107
2737596	BANK1	M	3.38697e-12	7.01669
3069082	TFEC	M	4.19049e-12	5.31832
3443857	CLECL1	M	6.79554e-12	5.88714
2362201	CD1C	M	8.05079e-12	8.59555
3141589	IL7	M	9.53862e-12	6.99193
2667809	OSBPL10	M	1.57319e-11	3.31177
3425983	PLEKHG7	M	1.61975e-11	3.39189
3408831	SSPN	M	2.03985e-11	3.35825
2531233	SP140	M	3.07385e-11	4.90007
2894573	GCNT2	M	4.45385e-11	2.885
3594986	TEX9	M	4.4617e-11	6.65345
2730503	ENAM	M	6.96839e-11	2.43909
3522662	GPR183	M	8.77225e-11	5.75455
2378121	TRAF3IP3	M	8.80567e-11	2.85205
3864646	KCNN4	M	9.36771e-11	2.11773
2690900	CD80	M	1.06042e-10	2.62801
2792166	2001-03-01	M	1.33555e-10	4.18775
3456049	ITGB7	M	2.52813e-10	2.20525
2434776	CDC42SE1	M	3.92819e-10	2.33003
3634811	CTSH	M	5.95945e-10	4.6189
3043895	SCRN1	M	6.716e-10	2.98326
3448088	BHLHE41	M	7.60798e-10	3.55295
3742627	C17orf87	M	8.24244e-10	18.7455
3346548	BIRC3	M	8.24321e-10	3.71907
3090209	ADAM28	M	8.52601e-10	6.72571
2420642	MCOLN2	M	1.26093e-09	5.84624
3257031	STAMBPL1	M	1.63779e-09	3.54771
3707596	LOC100130950	M	1.69131e-09	3.43772
3319137	PPFIBP2	M	1.69492e-09	2.59129
2584787	COBLL1	M	1.92405e-09	2.81856
3244622	ALOX5	M	1.92777e-09	2.71916
3361621	RIC3	M	3.1238e-09	2.65781
3921933	BACE2	M	4.89263e-09	2.71081
3267382	INPP5F	M	5.15564e-09	2.61528
2377332	CR1	M	5.17269e-09	2.96709
3452478	AMIGO2	M	5.87205e-09	2.44959
2766192	TLR10	M	6.25158e-09	5.16544
2657967	OSTN	M	6.28491e-09	2.36305
3458337	STAT6	M	6.94538e-09	2.0559
2445982	ANGPTL1	M	7.06993e-09	3.17126
3811339	BCL2	M	8.50194e-09	2.37814
2764192	SEL1L3	M	9.37427e-09	3.33602
2936657	CCR6	N	1.33652e-15	6.03119
3654175	IL4R	N	1.47856e-15	12.057
2734421	ARHGAP24	N	2.79153e-14	4.9749
2912649	COL19A1	N	2.79063e-13	5.8533
3708462	ACAP1	N	4.50463e-13	2.29303
2792166	2001-03-01	N	8.18122e-13	6.09991
2945741	FAM65B	N	1.13938e-12	3.18536
3756319	CCR7	N	1.97803e-12	7.17992
3650861	SYT17	N	4.64458e-12	3.19993
2378121	TRAF3IP3	N	4.98912e-12	3.30899
3471327	HVCN1	N	8.01605e-12	3.63276
2434776	CDC42SE1	N	8.50105e-12	2.7532
2688717	BTLA	N	9.228e-12	7.24532
3848492	FCER2	N	1.20083e-11	6.04889
3060182	ABCB1	N	1.89917e-11	2.33038
2476671	RASGRP3	N	1.92543e-11	4.11181
3431620	TCTN1	N	2.2694e-11	3.82729
2737596	BANK1	N	2.28273e-11	5.96544
3696142	DPEP2	N	2.60473e-11	2.51688
3304073	KCNIP2	N	2.96591e-11	3.15375
3346548	BIRC3	N	3.10787e-11	4.64764
3578152	TCL1A	N	3.49437e-11	7.40205
3090209	ADAM28	N	3.6649e-11	9.17075
3761164	SKAP1	N	4.14836e-11	4.82348
3812922	NETO1	N	8.8595e-11	4.9323
2439001	FCRL3	N	9.14255e-11	6.10552
3131881	PPAPDC1B	N	1.02441e-10	3.59535
3240987	MAP3K8	N	1.25087e-10	2.61699
2584904	SLC38A11	N	1.28175e-10	7.23456
2954527	ZNF318	N	1.32233e-10	2.57888
3946095	GRAP2	N	1.5643e-10	3.69365
2868265	LIX1	N	1.80432e-10	10.7207
3458337	STAT6	N	1.90087e-10	2.36822
2950263	HLA-DMB	N	2.14816e-10	4.76203
3921933	BACE2	N	2.22672e-10	3.19842
3958658	LARGE	N	2.27019e-10	2.40054
3397589	ETS1	N	3.77231e-10	2.54987
3319997	SWAP70	N	5.068e-10	4.50132
2764192	SEL1L3	N	5.43876e-10	4.01997
2950145	HLA-DOB	N	6.16498e-10	4.23452
2531233	SP140	N	6.4192e-10	3.95436
3830359	CD22	N	9.63972e-10	4.29374
2855434	C5orf39	N	9.76411e-10	2.67669
2452977	FAIM3	N	1.01112e-09	3.33382
3209384	TMEM2	N	1.08242e-09	3.79287
2520429	MYO1B	N	1.08478e-09	2.87189
2883440	ADAM19	N	1.22143e-09	2.3898
3267382	INPP5F	N	1.41283e-09	2.79163
3957790	PIK3IP1	N	1.48935e-09	2.1424
2439101	FCRL1	N	1.49249e-09	5.80534
2590715	FRZB	PC	5.10419e-23	12.8541
3279313	ITGA8	PC	8.24849e-19	21.9949
3129361	FBXO16	PC	9.52069e-19	44.5546
3680479	TXNDC11	PC	3.16654e-18	6.70437
3947036	MEI1	PC	7.30608e-18	13.4657
2919669	PRDM1	PC	1.37944e-17	17.5827
2976360	PERP	PC	1.80989e-17	12.4318
3318989	ZNF215	PC	2.10583e-17	15.4062
3075136	CREB3L2	PC	3.46955e-17	6.80226
3581637	ADAM6	PC	3.84913e-17	4.80644
2542795	SDC1	PC	4.10848e-17	4.95137
3574207	SEL1L	PC	4.83446e-17	13.9736
3954910	DERL3	PC	4.86312e-17	5.73319
3070309	CADPS2	PC	5.15538e-17	8.69672
2429235	AMPD1	PC	9.01058e-17	67.1202
3766651	ERN1	PC	9.14727e-17	5.35805
3938750	IGLV6-57	PC	9.54409e-17	48.1537
3938384	MIR650	PC	2.94212e-16	7.55501
3770512	C17orf28	PC	3.96101e-16	4.15677
2731636	PARM1	PC	4.63012e-16	8.75786
2639225	PDIA5	PC	5.14055e-16	6.6582
3018866	DNAJB9	PC	5.83932e-16	12.014
3043936	FKBP14	PC	6.78151e-16	6.70555
3453405	FKBP11	PC	7.77867e-16	13.1035
2845879	CLPTM1L	PC	8.84521e-16	4.42409
3338552	CTTN	PC	1.01689e-15	4.3226
3883441	SPAG4	PC	1.36286e-15	6.32403
3642137	SELS	PC	1.69717e-15	8.60612
2607110	HDLBP	PC	1.72158e-15	6.91968
2482230	ERLEC1	PC	1.92047e-15	11.6688
2893895	BMP6	PC	2.68001e-15	9.29931
3413950	SPATS2	PC	2.98805e-15	11.1256
3979101	FAAH2	PC	3.32269e-15	5.03555
3450775	KIF21A	PC	3.88286e-15	6.68999
3768474	WIPI1	PC	4.06548e-15	14.9097
2724094	FAM114A1	PC	4.80666e-15	3.92055
3489212	FNDC3A	PC	5.1145e-15	6.67385
2353988	FAM46C	PC	5.30495e-15	11.7594
2476671	RASGRP3	PC	5.90992e-15	8.8189
3225398	HSPA5	PC	6.72964e-15	5.13386
3735752	SEC14L1	PC	7.09638e-15	4.64012
3557350	SLC22A17	PC	8.81932e-15	3.16224
3752709	MYO1D	PC	9.26291e-15	5.95232
2515707	PDK1	PC	9.57732e-15	15.9559
2372812	RGS13	PC	1.06311e-14	5.76753
3469180	SLC41A2	PC	1.26132e-14	10.8075
3110317	CTHRC1	PC	1.40672e-14	11.1249
2420229	TTLL7	PC	1.5968e-14	7.01757
3662387	HERPUD1	PC	2.34408e-14	8.34015
3899173	RRBP1	PC	3.38869e-14	3.85066

## Sheet: Ark1
B Subset	Transcript ID	Gene Symbol	p value	Fold-Change
PreBI	3327143	RAG1	1.85193e-18	6.84282
	3369931	RAG2	2.19484e-16	13.9575
	2453307	CD34	3.76003e-16	6.25381
	3253683	ZMIZ1	2.56884e-15	4.1679
	2616596	ARPP21	6.9585e-15	6.14853
	2931569	AKAP12	7.75634e-15	5.70872
	3426257	SOCS2	1.50952e-14	5.87642
	3259503	DNTT	1.40009e-13	51.2715
	3852880	EMR2	1.71115e-13	3.8052
	3817698	UHRF1	2.38161e-13	4.84814
	3938792	VPREB1	2.80029e-13	11.0423
	3737874	BAHCC1	1.82903e-12	12.0991
	3473750	VSIG10	1.99579e-12	2.87751
	3955815	HPS4	2.33505e-12	4.30566
	3921068	ETS2	2.79825e-12	6.77281
	2371547	C1orf21	2.84362e-12	3.18812
	3624513	MYO5C	3.34523e-12	7.50761
	2679014	NPCDR1	4.91782e-12	5.93375
	3463112	E2F7	5.18744e-12	2.82729
	4001369	SCML2	7.26441e-12	5.09399
	3142217	PAG1	7.37903e-12	3.99335
	2649824	SCHIP1	7.61129e-12	5.32882
	2833623	HMHB1	8.56208e-12	8.84485
	2692447	MYLK	1.20277e-11	3.09062
	3061319	CDK6	1.21366e-11	4.78241
	3931765	ERG	1.47279e-11	13.777
	3365776	E2F8	1.48494e-11	4.81081
	3599811	KIF23	2.36148e-11	7.33074
	3980560	KIF4A	2.85849e-11	5.91067
	3254609	SH2D4B	3.2019e-11	2.73254
	2648677	MME	3.62144e-11	11.0656
	3312490	MKI67	4.82636e-11	13.6351
	3510450	LHFP	5.43377e-11	3.20461
	3264621	TCF7L2	6.04572e-11	6.49586
	2748830	GUCY1A3	6.66612e-11	5.38615
	3907011	ADA	6.96592e-11	3.60896
	3286792	C10orf25	7.63839e-11	5.49685
	2913694	CD109	8.89632e-11	2.75035
	3353335	UBASH3B	1.05771e-10	2.94153
	3279982	PTPLA	1.33786e-10	3.01326
	3474104	CIT	1.36431e-10	2.97741
	3771642	CYGB	1.4557e-10	3.76321
	3454223	RACGAP1	1.63981e-10	4.53916
	2781138	LEF1	1.75523e-10	6.26857
	3538893	PRKCH	1.77418e-10	5.39861
	3333247	FADS2	1.93232e-10	2.21961
	3820921	SMARCA4	2.17854e-10	2.30177
	3876645	BTBD3	2.24743e-10	3.32512
	3409211	PPFIBP1	2.7512e-10	2.97723
	3751323	MYO18A	2.86781e-10	2.06987
PreBII	3327143	RAG1	3.51244e-17	5.45874
	3369931	RAG2	1.39003e-16	14.466
	3365776	E2F8	9.96265e-15	8.62105
	2875193	P4HA2	1.17502e-14	4.67379
	2616596	ARPP21	1.2546e-14	5.82361
	3463112	E2F7	6.46824e-14	3.50501
	3291435	RTKN2	1.45855e-13	4.20233
	3938792	VPREB1	7.50307e-13	9.85163
	3461496	BEST3	2.15971e-12	6.55887
	2597867	IKZF2	2.19812e-12	9.04414
	2931569	AKAP12	4.24538e-12	3.72989
	2969289	WASF1	4.67191e-12	8.95872
	3936913	CDC45	4.95597e-12	6.53354
	3980560	KIF4A	1.40918e-11	6.20815
	3882012	DNMT3B	1.53165e-11	2.41757
	2715076	WHSC1	1.70983e-11	2.58676
	2648677	MME	2.12174e-11	11.5997
	3744965	GAS7	3.12753e-11	3.98177
	3779950	C18orf1	3.43496e-11	2.7252
	4011743	SLC7A3	3.46647e-11	4.55121
	3876645	BTBD3	3.48257e-11	3.68845
	3744263	AURKB	3.49571e-11	4.33564
	3625761	MNS1	4.81275e-11	5.32297
	2570616	BUB1	5.58379e-11	6.19522
	3454223	RACGAP1	6.30936e-11	4.82738
	2401448	E2F2	7.95861e-11	2.92952
	2688605	GCET2	9.37008e-11	5.42262
	3607537	FANCI	1.18233e-10	5.20076
	2752725	NEIL3	1.35859e-10	5.24936
	3599811	KIF23	1.4212e-10	6.18011
	3994915	HMGB3	2.17041e-10	3.26913
	2620256	KIF15	2.19047e-10	7.56672
	3758317	BRCA1	2.35745e-10	3.45264
	2784113	CCNA2	2.38457e-10	5.07104
	3689880	SHCBP1	2.50111e-10	4.90447
	2516023	CDCA7	2.77424e-10	3.85317
	3920003	CHAF1B	2.85823e-10	3.14256
	2781138	LEF1	2.88141e-10	5.94603
	3604147	KIAA1199	3.3051e-10	2.19588
	2858592	DEPDC1B	3.48035e-10	5.94644
	3852565	ASF1B	3.53886e-10	3.83229
	3578152	TCL1A	3.67896e-10	6.83255
	4052881	FAM72D	3.68498e-10	6.97116
	3590014	CASC5	3.7903e-10	5.94262
	3651478	ACSM3	3.98615e-10	6.22812
	3312490	MKI67	4.03716e-10	10.469
	3140478	C8orf84	4.22879e-10	2.20585
	3129149	PBK	4.3187e-10	7.50969
	2388219	EXO1	4.70648e-10	6.01764
	3319937	WEE1	5.37168e-10	2.72585
Immature B-cells	3578152	TCL1A	1.97659e-11	9.08392
	3881651	HCK	7.89912e-11	3.88036
	3861272	PPP1R14A	1.86286e-10	3.47484
	2999755	AEBP1	3.50341e-10	3.10351
	3684039	CRYM	1.18407e-09	3.26679
	3204648	CD72	1.25209e-09	4.29321
	3919860	DOPEY2	1.3315e-09	2.44982
	3403092	PTPN6	2.37822e-09	2.30103
	3057370	HIP1	1.02572e-08	2.10096
	3329983	PTPRJ	1.2021e-08	4.73951
	2733483	BMP3	1.34798e-08	4.21256
	3924041	ADARB1	1.96987e-08	3.51631
	2810764	GAPT	2.41139e-08	3.32974
	3244622	ALOX5	2.87208e-08	2.54191
	2969289	WASF1	3.58551e-08	4.11253
	2524653	ADAM23	4.07006e-08	5.47356
	3381817	UCP2	4.45091e-08	2.51428
	3154263	SLA	5.00481e-08	3.03178
	4035833	CD24	7.8164e-08	2.31471
	2579572	ZEB2	9.79146e-08	2.3381
	2439101	FCRL1	1.06753e-07	4.50854
	3098977	LYN	1.28931e-07	3.00229
	3432556	DTX1	1.69219e-07	2.68805
	3839346	SPIB	1.73182e-07	3.6161
	3839360	MYBPC2	1.79302e-07	3.11105
	2363852	FCRLA	2.64924e-07	3.53857
	2689286	KIAA1407	2.88518e-07	3.5438
	3061997	PON2	2.90971e-07	2.64081
	3151970	MTSS1	3.11587e-07	3.70199
	3926271	TMPRSS15	3.70629e-07	2.25373
	3703129	C16orf74	3.71181e-07	2.34003
	3621623	ELL3	4.10536e-07	3.30223
	2373842	PTPRC	5.05014e-07	2.44768
	2687255	CBLB	5.06101e-07	2.50839
	3824427	FAM129C	5.84748e-07	2.6327
	2349129	S1PR1	6.22487e-07	3.06545
	3178952	SYK	6.95725e-07	2.14414
	3822849	CLEC17A	7.02307e-07	2.94784
	2678298	DNASE1L3	8.15611e-07	2.93188
	2405250	FNDC5	9.9972e-07	2.99812
	2475678	LBH	1.0709e-06	2.87814
	2451139	ARL8A	1.08778e-06	2.68926
	3740201	MYO1C	1.11553e-06	3.16235
	2860178	CD180	1.21781e-06	2.80416
	2603051	SP110	1.26954e-06	2.16403
	2470165	TRIB2	1.50586e-06	2.61702
	3060117	ABCB4	1.91893e-06	2.57485
	3915936	NCAM2	2.09678e-06	2.29899
	3333595	GNG3	2.29224e-06	3.9313
	3516639	PCDH9	2.31494e-06	3.19958
Memory B-cells	2734421	ARHGAP24	6.91971e-16	6.52086
	2530425	COL4A3	1.96583e-14	2.70098
	3869097	SIGLEC6	5.34399e-14	3.39385
	2936657	CCR6	6.53285e-14	4.58948
	3708462	ACAP1	7.09309e-14	2.45807
	2945741	FAM65B	3.87758e-13	3.37026
	2439554	AIM2	8.20013e-13	24.611
	3290875	ANK3	9.02717e-13	2.45107
	2737596	BANK1	3.38697e-12	7.01669
	3069082	TFEC	4.19049e-12	5.31832
	3443857	CLECL1	6.79554e-12	5.88714
	2362201	CD1C	8.05079e-12	8.59555
	3141589	IL7	9.53862e-12	6.99193
	2667809	OSBPL10	1.57319e-11	3.31177
	3425983	PLEKHG7	1.61975e-11	3.39189
	3408831	SSPN	2.03985e-11	3.35825
	2531233	SP140	3.07385e-11	4.90007
	2894573	GCNT2	4.45385e-11	2.885
	3594986	TEX9	4.4617e-11	6.65345
	2730503	ENAM	6.96839e-11	2.43909
	3522662	GPR183	8.77225e-11	5.75455
	2378121	TRAF3IP3	8.80567e-11	2.85205
	3864646	KCNN4	9.36771e-11	2.11773
	2690900	CD80	1.06042e-10	2.62801
	2792166	2001-03-01	1.33555e-10	4.18775
	3456049	ITGB7	2.52813e-10	2.20525
	2434776	CDC42SE1	3.92819e-10	2.33003
	3634811	CTSH	5.95945e-10	4.6189
	3043895	SCRN1	6.716e-10	2.98326
	3448088	BHLHE41	7.60798e-10	3.55295
	3742627	C17orf87	8.24244e-10	18.7455
	3346548	BIRC3	8.24321e-10	3.71907
	3090209	ADAM28	8.52601e-10	6.72571
	2420642	MCOLN2	1.26093e-09	5.84624
	3257031	STAMBPL1	1.63779e-09	3.54771
	3707596	LOC100130950	1.69131e-09	3.43772
	3319137	PPFIBP2	1.69492e-09	2.59129
	2584787	COBLL1	1.92405e-09	2.81856
	3244622	ALOX5	1.92777e-09	2.71916
	3361621	RIC3	3.1238e-09	2.65781
	3921933	BACE2	4.89263e-09	2.71081
	3267382	INPP5F	5.15564e-09	2.61528
	2377332	CR1	5.17269e-09	2.96709
	3452478	AMIGO2	5.87205e-09	2.44959
	2766192	TLR10	6.25158e-09	5.16544
	2657967	OSTN	6.28491e-09	2.36305
	3458337	STAT6	6.94538e-09	2.0559
	2445982	ANGPTL1	7.06993e-09	3.17126
	3811339	BCL2	8.50194e-09	2.37814
	2764192	SEL1L3	9.37427e-09	3.33602
Naive B-cells	2936657	CCR6	1.33652e-15	6.03119
	3654175	IL4R	1.47856e-15	12.057
	2734421	ARHGAP24	2.79153e-14	4.9749
	2912649	COL19A1	2.79063e-13	5.8533
	3708462	ACAP1	4.50463e-13	2.29303
	2792166	2001-03-01	8.18122e-13	6.09991
	2945741	FAM65B	1.13938e-12	3.18536
	3756319	CCR7	1.97803e-12	7.17992
	3650861	SYT17	4.64458e-12	3.19993
	2378121	TRAF3IP3	4.98912e-12	3.30899
	3471327	HVCN1	8.01605e-12	3.63276
	2434776	CDC42SE1	8.50105e-12	2.7532
	2688717	BTLA	9.228e-12	7.24532
	3848492	FCER2	1.20083e-11	6.04889
	3060182	ABCB1	1.89917e-11	2.33038
	2476671	RASGRP3	1.92543e-11	4.11181
	3431620	TCTN1	2.2694e-11	3.82729
	2737596	BANK1	2.28273e-11	5.96544
	3696142	DPEP2	2.60473e-11	2.51688
	3304073	KCNIP2	2.96591e-11	3.15375
	3346548	BIRC3	3.10787e-11	4.64764
	3578152	TCL1A	3.49437e-11	7.40205
	3090209	ADAM28	3.6649e-11	9.17075
	3761164	SKAP1	4.14836e-11	4.82348
	3812922	NETO1	8.8595e-11	4.9323
	2439001	FCRL3	9.14255e-11	6.10552
	3131881	PPAPDC1B	1.02441e-10	3.59535
	3240987	MAP3K8	1.25087e-10	2.61699
	2584904	SLC38A11	1.28175e-10	7.23456
	2954527	ZNF318	1.32233e-10	2.57888
	3946095	GRAP2	1.5643e-10	3.69365
	2868265	LIX1	1.80432e-10	10.7207
	3458337	STAT6	1.90087e-10	2.36822
	2950263	HLA-DMB	2.14816e-10	4.76203
	3921933	BACE2	2.22672e-10	3.19842
	3958658	LARGE	2.27019e-10	2.40054
	3397589	ETS1	3.77231e-10	2.54987
	3319997	SWAP70	5.068e-10	4.50132
	2764192	SEL1L3	5.43876e-10	4.01997
	2950145	HLA-DOB	6.16498e-10	4.23452
	2531233	SP140	6.4192e-10	3.95436
	3830359	CD22	9.63972e-10	4.29374
	2855434	C5orf39	9.76411e-10	2.67669
	2452977	FAIM3	1.01112e-09	3.33382
	3209384	TMEM2	1.08242e-09	3.79287
	2520429	MYO1B	1.08478e-09	2.87189
	2883440	ADAM19	1.22143e-09	2.3898
	3267382	INPP5F	1.41283e-09	2.79163
	3957790	PIK3IP1	1.48935e-09	2.1424
	2439101	FCRL1	1.49249e-09	5.80534
Plasma cells	2590715	FRZB	5.10419e-23	12.8541
	3279313	ITGA8	8.24849e-19	21.9949
	3129361	FBXO16	9.52069e-19	44.5546
	3680479	TXNDC11	3.16654e-18	6.70437
	3947036	MEI1	7.30608e-18	13.4657
	2919669	PRDM1	1.37944e-17	17.5827
	2976360	PERP	1.80989e-17	12.4318
	3318989	ZNF215	2.10583e-17	15.4062
	3075136	CREB3L2	3.46955e-17	6.80226
	3581637	ADAM6	3.84913e-17	4.80644
	2542795	SDC1	4.10848e-17	4.95137
	3574207	SEL1L	4.83446e-17	13.9736
	3954910	DERL3	4.86312e-17	5.73319
	3070309	CADPS2	5.15538e-17	8.69672
	2429235	AMPD1	9.01058e-17	67.1202
	3766651	ERN1	9.14727e-17	5.35805
	3938750	IGLV6-57	9.54409e-17	48.1537
	3938384	MIR650	2.94212e-16	7.55501
	3770512	C17orf28	3.96101e-16	4.15677
	2731636	PARM1	4.63012e-16	8.75786
	2639225	PDIA5	5.14055e-16	6.6582
	3018866	DNAJB9	5.83932e-16	12.014
	3043936	FKBP14	6.78151e-16	6.70555
	3453405	FKBP11	7.77867e-16	13.1035
	2845879	CLPTM1L	8.84521e-16	4.42409
	3338552	CTTN	1.01689e-15	4.3226
	3883441	SPAG4	1.36286e-15	6.32403
	3642137	SELS	1.69717e-15	8.60612
	2607110	HDLBP	1.72158e-15	6.91968
	2482230	ERLEC1	1.92047e-15	11.6688
	2893895	BMP6	2.68001e-15	9.29931
	3413950	SPATS2	2.98805e-15	11.1256
	3979101	FAAH2	3.32269e-15	5.03555
	3450775	KIF21A	3.88286e-15	6.68999
	3768474	WIPI1	4.06548e-15	14.9097
	2724094	FAM114A1	4.80666e-15	3.92055
	3489212	FNDC3A	5.1145e-15	6.67385
	2353988	FAM46C	5.30495e-15	11.7594
	2476671	RASGRP3	5.90992e-15	8.8189
	3225398	HSPA5	6.72964e-15	5.13386
	3735752	SEC14L1	7.09638e-15	4.64012
	3557350	SLC22A17	8.81932e-15	3.16224
	3752709	MYO1D	9.26291e-15	5.95232
	2515707	PDK1	9.57732e-15	15.9559
	2372812	RGS13	1.06311e-14	5.76753
	3469180	SLC41A2	1.26132e-14	10.8075
	3110317	CTHRC1	1.40672e-14	11.1249
	2420229	TTLL7	1.5968e-14	7.01757
	3662387	HERPUD1	2.34408e-14	8.34015
	3899173	RRBP1	3.38869e-14	3.85066
