# Supplementary material for: Validation and implementation of a method for microarray gene expression profiling of minor B-cell subpopulations in man
Source: BMC Immunol. 2014 Jan 31;15:3. doi: 10.1186/1471-2172-15-3 (PMC3937209; doi:10.1186/1471-2172-15-3)
Supplement: Additional file 11 — Gene specific B-cell atlas in Tonsils. Significantly up-regulated genes in normal B-cell subsets from tonsils were generated by a 2-way ANOVA model, including donor and B-cell subsets. Up-regulated genes in each B-cell subset compared to the rest were created (fold change > 2, FDR p-values below 0.05). The top 50 from this list are presented in accordance to p-value. [file 1471-2172-15-3-S11.xlsx]

## Sheet: Top50 in tonsils U133
B Subset	Transcript ID	Gene Symbol	p value	Fold-Change
Naive B-cells	221601_s_at	FAIM3	1.04e-16	7.1
	206760_s_at	FCER2	2.52e-16	15.3
	224451_x_at	ARHGAP9	3.97e-16	2.8
	238071_at	LCN10 /// LCN6	1.05e-15	8.1
	201010_s_at	TXNIP	1.52e-15	3
	210644_s_at	LAIR1	1.62e-15	13.9
	225369_at	ESAM	2.43e-15	9.5
	213566_at	RNASE6	2.58e-15	10.4
	219014_at	PLAC8	4.23e-15	16.6
	212558_at	SPRY1	5.05e-15	32
	209993_at	ABCB1	1.54e-14	15.1
	204642_at	S1PR1	2.25e-14	38.9
	1553995_a_at	NT5E	2.64e-14	13
	210432_s_at	SCN3A	2.89e-14	26.3
	219265_at	MOB3B	4.89e-14	8.4
	240890_at	LOC643733	8.38e-14	21.9
	1553380_at	PARP15	8.97e-14	14.4
	218223_s_at	PLEKHO1	9.46e-14	3.6
	200602_at	APP	1.21e-13	29.2
	206394_at	MYBPC2	1.47e-13	8.3
	201008_s_at	TXNIP	1.61e-13	2.7
	222747_s_at	SCML1	5.26e-13	5.5
	215925_s_at	CD72	5.51e-13	5.1
	200904_at	HLA-E	6.03e-13	2.8
	206983_at	CCR6	6.28e-13	11.8
	206759_at	FCER2	7.01e-13	13.5
	232985_s_at	DPPA4	7.33e-13	31.3
	201160_s_at	CSDA	8.97e-13	10.2
	203038_at	PTPRK	9.45e-13	15.9
	227353_at	TMC8	1.19e-12	3.2
	243968_x_at	FCRL1	1.29e-12	2.5
	222640_at	DNMT3A	1.31e-12	10.1
	212774_at	ZNF238	1.54e-12	2.1
	223971_at	OR2A20P /// OR2A9P	1.81e-12	7.7
	212526_at	SPG20	1.88e-12	17.9
	224701_at	PARP14	2.43e-12	3.1
	230866_at	CYSLTR1	2.45e-12	5.2
	1560520_at	LOC401312	2.61e-12	13.8
	226844_at	MOB3B	2.85e-12	10.8
	227486_at	NT5E	3.88e-12	15.5
	236226_at	BTLA	4.02e-12	9.3
	232543_x_at	ARHGAP9	4.02e-12	2.6
	202727_s_at	IFNGR1	4.05e-12	3.2
	226585_at	NEIL2	4.65e-12	3.2
	221978_at	HLA-F	4.67e-12	2.9
	226906_s_at	ARHGAP9	5.06e-12	2.2
	222449_at	PMEPA1	6.01e-12	3.7
	243438_at	PDE7B	6.7e-12	4.2
	221756_at	PIK3IP1	8.73e-12	4.6
	201925_s_at	CD55	1.04e-11	3.3
Centroblasts	218418_s_at	KANK2	7.47e-18	28.5
	209026_x_at	TUBB	7.99e-17	3
	212021_s_at	MKI67	9.52e-17	9.1
	202154_x_at	TUBB3	1.36e-16	3.4
	218039_at	NUSAP1	1.91e-16	6.9
	236641_at	KIF14	2.79e-16	16.9
	229343_at	GTSE1	3.21e-16	6.2
	1552619_a_at	ANLN	3.64e-16	13.7
	219990_at	E2F8	4.89e-16	13.9
	228758_at	BCL6	6.18e-16	5.9
	235545_at	DEPDC1	9.53e-16	15.6
	213726_x_at	TUBB4B	1.03e-15	3.5
	211714_x_at	TUBB	1.12e-15	3
	213476_x_at	TUBB3	1.12e-15	3.2
	202705_at	CCNB2	1.58e-15	12
	236852_at	FBXO43	1.69e-15	7
	223311_s_at	MTA3	1.79e-15	4.8
	221436_s_at	CDCA3	1.89e-15	8.3
	203434_s_at	MME	2.01e-15	16.1
	214728_x_at	SMARCA4	3.07e-15	2.4
	219502_at	NEIL3	3.07e-15	14
	232238_at	ASPM	3.53e-15	21.9
	208794_s_at	SMARCA4	3.55e-15	2.4
	208977_x_at	TUBB4B	3.8e-15	3.6
	211040_x_at	GTSE1	4.36e-15	2.3
	226980_at	DEPDC1B	4.88e-15	8.2
	203140_at	BCL6	5.46e-15	5.9
	219229_at	SLCO3A1	8.74e-15	4.5
	220295_x_at	DEPDC1	1.12e-14	15.3
	225601_at	HMGB3	1.33e-14	11.5
	203362_s_at	MAD2L1	1.48e-14	6.5
	215215_s_at	LOC81691	2.14e-14	3.5
	212330_at	TFDP1	2.26e-14	2.3
	215942_s_at	GTSE1	2.41e-14	15.7
	201292_at	TOP2A	2.51e-14	25.8
	203214_x_at	CDK1	3.16e-14	7.2
	211058_x_at	LOC100288366 /// TUBA1B	3.34e-14	2.7
	210559_s_at	CDK1	3.49e-14	8
	213911_s_at	H2AFZ	3.98e-14	2.2
	219396_s_at	MIR631 /// NEIL1	5.13e-14	3.3
	205024_s_at	RAD51	5.54e-14	6.4
	219148_at	PBK	6.07e-14	30.1
	205046_at	CENPE	6.35e-14	32.5
	235572_at	SPC24	6.38e-14	7.5
	218009_s_at	PRC1	6.39e-14	7.1
	231455_at	LINC00487	7.38e-14	25.5
	219840_s_at	TCL6	7.72e-14	9.7
	209408_at	KIF2C	8e-14	7.1
	202870_s_at	CDC20	8.07e-14	11.1
	211750_x_at	TUBA1C	8.4e-14	2.9
Centrocytes	200644_at	MARCKSL1	1.64e-16	2.8
	228758_at	BCL6	2.77e-16	6.3
	1553475_at	PRO1483	1.64e-15	14.2
	203140_at	BCL6	4.36e-15	6
	1557366_at	CCDC144A /// CCDC144B /	6.36e-15	9
	201678_s_at	C3orf37	2.32e-14	3.7
	231455_at	LINC00487	3.11e-14	28.9
	223311_s_at	MTA3	5.45e-14	3.8
	219646_at	DEF8	6.22e-14	3.3
	201677_at	C3orf37	2.26e-13	4.6
	219990_at	E2F8	4.36e-13	7.1
	1562637_at	SAMD12	5.61e-13	8.2
	210258_at	RGS13	5.78e-13	5.7
	219280_at	BRWD1	6.73e-13	2.3
	202154_x_at	TUBB3	1.2e-12	2.3
	225501_at	PHF6	1.43e-12	2.7
	219901_at	FGD6	1.49e-12	10.9
	203434_s_at	MME	1.54e-12	7.9
	204249_s_at	LMO2	1.68e-12	3.9
	217966_s_at	FAM129A	1.79e-12	3.2
	224811_at	LPP	1.92e-12	4.2
	242334_at	NLRP4	1.99e-12	11.9
	225997_at	MOB1B	2.46e-12	3.1
	1554413_s_at	SNX29P1 /// SNX29P2	3.06e-12	2.4
	219396_s_at	MIR631 /// NEIL1	3.23e-12	2.7
	212829_at	PIP4K2A	3.89e-12	2.1
	226799_at	FGD6	4.06e-12	10.3
	202998_s_at	LOXL2	4.69e-12	9.6
	204674_at	LRMP	4.7e-12	2.2
	212021_s_at	MKI67	5.46e-12	3.9
	218039_at	NUSAP1	5.66e-12	3.4
	233177_s_at	PNKD	6.82e-12	7.4
	209861_s_at	METAP2	7.9e-12	2.4
	234072_at	SEMA4A	8.3e-12	4.9
	209339_at	SIAH2	9.13e-12	3
	210404_x_at	CAMK2B	1.15e-11	4.2
	216364_s_at	AFF2	1.25e-11	6.1
	219259_at	SEMA4A	1.33e-11	4.5
	243954_at	LOC285286	1.34e-11	7.8
	202821_s_at	LPP	1.37e-11	6.2
	235000_at	LPP	1.38e-11	8.9
	224428_s_at	CDCA7	1.6e-11	9.8
	226930_at	FNDC1	2.09e-11	8.4
	221078_s_at	CCDC88A	2.93e-11	4.5
	203362_s_at	MAD2L1	3.29e-11	3.7
	1555137_a_at	FGD6	3.42e-11	16.6
	219502_at	NEIL3	3.6e-11	5.6
	201259_s_at	SYPL1	3.86e-11	2.2
	235588_at	ESCO2	4.2e-11	6.2
	202705_at	CCNB2	4.82e-11	4.8
Memory B-cells	224925_at	PREX1	8.5e-18	7.1
	201010_s_at	TXNIP	3.7e-16	3.2
	206519_x_at	SIGLEC6	5.22e-16	43.8
	235281_x_at	AHNAK	6.08e-16	17.4
	219014_at	PLAC8	1.61e-15	18.8
	221601_s_at	FAIM3	3.04e-15	5.5
	201850_at	CAPG	5.32e-15	10.5
	204655_at	CCL5	7.29e-15	7.6
	210796_x_at	SIGLEC6	7.94e-15	21.1
	206520_x_at	SIGLEC6	1.77e-14	16.9
	204638_at	ACP5	1.99e-14	6.5
	213418_at	HSPA6	2.08e-14	12.5
	201008_s_at	TXNIP	2.94e-14	2.9
	213566_at	RNASE6	4.06e-14	8
	238071_at	LCN10 /// LCN6	5.07e-14	5.8
	230866_at	CYSLTR1	5.16e-14	7.1
	221530_s_at	BHLHE41	7.31e-14	7.9
	1563560_at	AHNAK	7.9e-14	16.3
	1553380_at	PARP15	9.51e-14	14.3
	219265_at	MOB3B	1.44e-13	7.6
	200904_at	HLA-E	2.11e-13	2.9
	217984_at	RNASET2	4.26e-13	3.2
	200761_s_at	ARL6IP5	4.45e-13	2.8
	227353_at	TMC8	4.77e-13	3.4
	221978_at	HLA-F	5.31e-13	3.3
	206983_at	CCR6	5.68e-13	11.9
	200760_s_at	ARL6IP5	8.78e-13	2.5
	117_at	HSPA6	9.31e-13	5.7
	211986_at	AHNAK	9.89e-13	6.7
	228372_at	C10orf128	1.71e-12	39.1
	209835_x_at	CD44	1.76e-12	6.6
	201169_s_at	BHLHE40	2.28e-12	7.2
	212014_x_at	CD44	2.39e-12	6.6
	1555759_a_at	CCL5	2.39e-12	8.4
	221875_x_at	HLA-F	2.44e-12	2.6
	203186_s_at	S100A4	3.54e-12	8.9
	212774_at	ZNF238	4.22e-12	2
	205987_at	CD1C	5.93e-12	4.6
	201170_s_at	BHLHE40	6.1e-12	16.8
	208488_s_at	CR1	6.98e-12	3.1
	204490_s_at	CD44	7.02e-12	6.6
	1405_i_at	CCL5	7.25e-12	26
	224909_s_at	PREX1	7.38e-12	5.7
	219359_at	ATHL1	7.48e-12	3.8
	205786_s_at	ITGAM	8.65e-12	40.6
	210992_x_at	FCGR2C	9.6e-12	8.1
	1556839_s_at	LOC100289090	9.9e-12	13.5
	204806_x_at	HLA-F	1.09e-11	2.4
	211583_x_at	NCR3	1.12e-11	4.7
	225524_at	ANTXR2	1.22e-11	10.7
Plasmablasts	231824_at	LARP1B	2.16e-21	29
	234306_s_at	SLAMF7	2.99e-21	45.2
	208639_x_at	PDIA6	3.78e-21	2.8
	221004_s_at	ITM2C	1.43e-20	11.8
	242153_at	LARP1B	1.57e-20	20.3
	1560426_at	C12orf55 /// C12orf63	1.86e-20	46
	207668_x_at	PDIA6	2.05e-20	2.7
	223070_at	SELK	2.06e-20	6.2
	222692_s_at	FNDC3B	2.38e-20	60.8
	229721_x_at	DERL3	2.57e-20	24.4
	1556841_a_at	ALDH1L2	2.96e-20	10.7
	234477_at	IGHA1 /// IGHV4-31 ///	3.2e-20	23.4
	216365_x_at	IGLC1 /// IGLJ3	3.54e-20	15.4
	235641_at	TRIB1	3.84e-20	24.5
	222245_s_at	FER1L4	4.5e-20	8.7
	200967_at	PPIB	5.87e-20	4.7
	221286_s_at	MZB1	7.02e-20	18.7
	244593_at	C17orf28	9.13e-20	19.5
	200670_at	XBP1	1.1e-19	23.7
	201398_s_at	TRAM1	1.38e-19	5.5
	244509_at	GPR155	1.7e-19	12.3
	203857_s_at	PDIA5	2.64e-19	18.9
	200599_s_at	HSP90B1 /// MIR3652	2.77e-19	4.7
	203065_s_at	CAV1	3.2e-19	28.4
	223209_s_at	VIMP	3.35e-19	15.1
	222693_at	FNDC3B	3.7e-19	73.1
	234792_x_at	IGHA1 /// IGHV4-31 ///	4.93e-19	26.1
	210534_s_at	B9D1	6.81e-19	10.7
	234366_x_at	CKAP2 /// IGLC1	6.88e-19	22
	217716_s_at	SEC61A1	7.16e-19	5.7
	234419_x_at	IGHA1 /// IGHG1 /// IGH	7.44e-19	8.8
	216640_s_at	PDIA6	9.49e-19	4.3
	204255_s_at	VDR	1.3e-18	15.1
	201131_s_at	CDH1	1.31e-18	36.3
	229719_s_at	DERL3	1.41e-18	17.8
	234364_at	CKAP2	1.54e-18	16.4
	224630_at	ERLEC1	1.86e-18	10
	202655_at	MANF	2.03e-18	6.7
	222971_at	NDUFA2	2.73e-18	33.5
	217084_at	IGHA1 /// IGHG1 /// IGH	2.93e-18	12
	203133_at	SEC61B	3.51e-18	5.4
	217480_x_at	LOC100287723	3.51e-18	6
	216986_s_at	IRF4	3.59e-18	27.9
	201286_at	SDC1	3.69e-18	13.2
	1559393_at	ALDH1L2	3.86e-18	58.7
	202908_at	WFS1	3.98e-18	11.4
	200087_s_at	TMED2	3.98e-18	3
	236055_at	DQX1	4e-18	9
	218618_s_at	FNDC3B	4.17e-18	27.8
	1554038_at	LARP1B	4.22e-18	14.4
